# Supplementary material for: Tuneable optical gain and broadband lasing driven in electrospun polymer fibers by high dye concentration
Source: Royal Society of Chemistry journal article supplement (doi:10.1039/d1tc05089c), 2022-01-01
Supplement: d1tc05089c1.pdf [file d1tc05089c1.pdf]

Electronic Supplementary Information

**Tuneable optical gain and broadband lasing driven in electrospun polymer fibers by high dye concentration**

*Giovanni Morello,<sup>a</sup> Maria Moffa,<sup>b</sup> Martina Montinaro,<sup>a</sup> Annachiara Albanese,<sup>bc</sup> Karolis Kazlauskas,<sup>d</sup> Saulius Jursenas,<sup>d</sup> Ausra Tomkeviciene,<sup>e</sup> Juozas V. Grazulevicius,<sup>e</sup> Andrea Camposeo<sup>\*b</sup> and Dario Pisignano<sup>\*abc</sup>*

<sup>a</sup> Dipartimento di Matematica e Fisica “Ennio De Giorgi”, Università del Salento, via Arnesano I-73100 Lecce, Italy.

<sup>b</sup> NEST, Istituto Nanoscienze-CNR and Scuola Normale Superiore, Piazza S. Silvestro 12, I-56127 Pisa, Italy. \*E-mail: andrea.camposeo@nano.cnr.it.

<sup>c</sup> Dipartimento di Fisica, Università di Pisa, Largo B. Pontecorvo 3, I-56127 Pisa, Italy. \*E-mail: dario.pisignano@unipi.it.

<sup>d</sup> Institute of Photonics and Nanotechnology, Vilnius University, Sauletekio Av. 3, LT-10257, Vilnius, Lithuania.

<sup>e</sup> Department of Polymer Chemistry and Technology, Kaunas University of Technology, Radvilenu pl. 19, LT-50254 Kaunas, Lithuania.

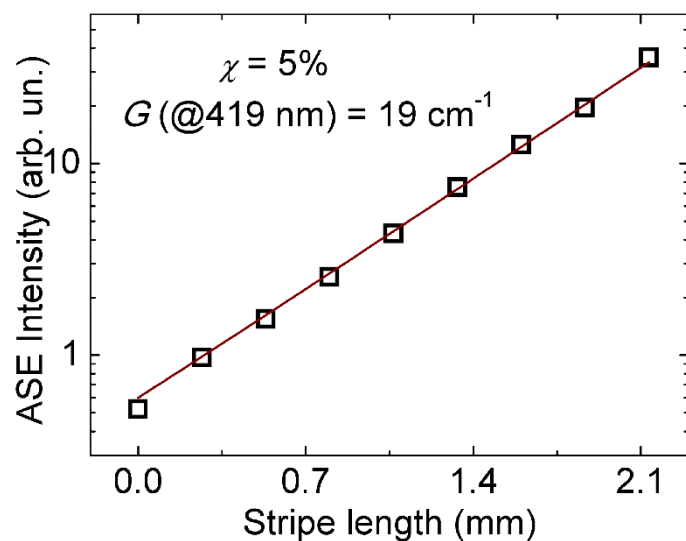

**Figure S1.** Dependence of the ASE intensity ( $\chi = 5\%$ , wavelength = 419 nm) on the excitation stripe length (squares) and corresponding best fit to the Eq. (1) (continuous line).

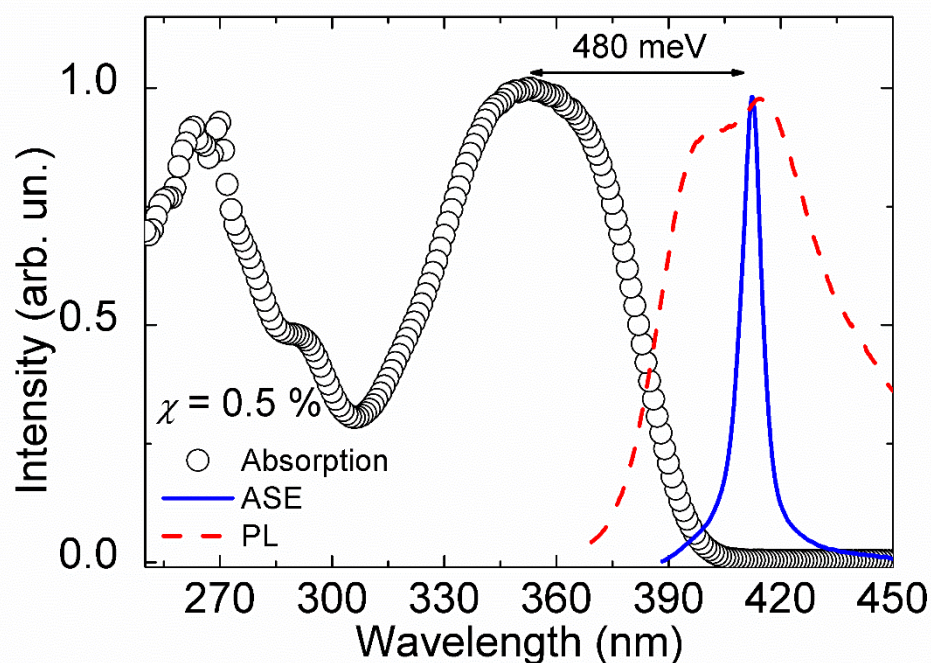

**Figure S2.** Normalized absorption (empty circles), photoluminescence (PL, red dashed line) and amplified spontaneous emission (ASE, blue continuous line) spectra of spin-coated films of FCF. The shift between the peak wavelengths of the absorption and ASE spectra is 480 meV.

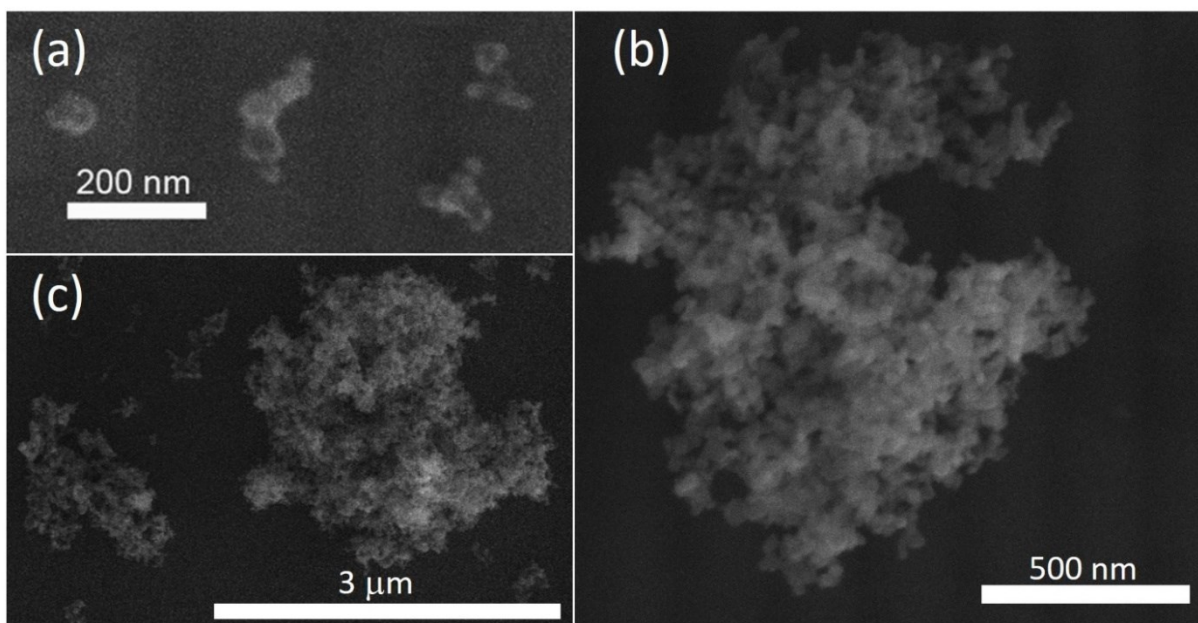

**Figure S3.** SEM micrographs of a few TiO<sub>2</sub> nanoparticles (a) and clusters (b,c).

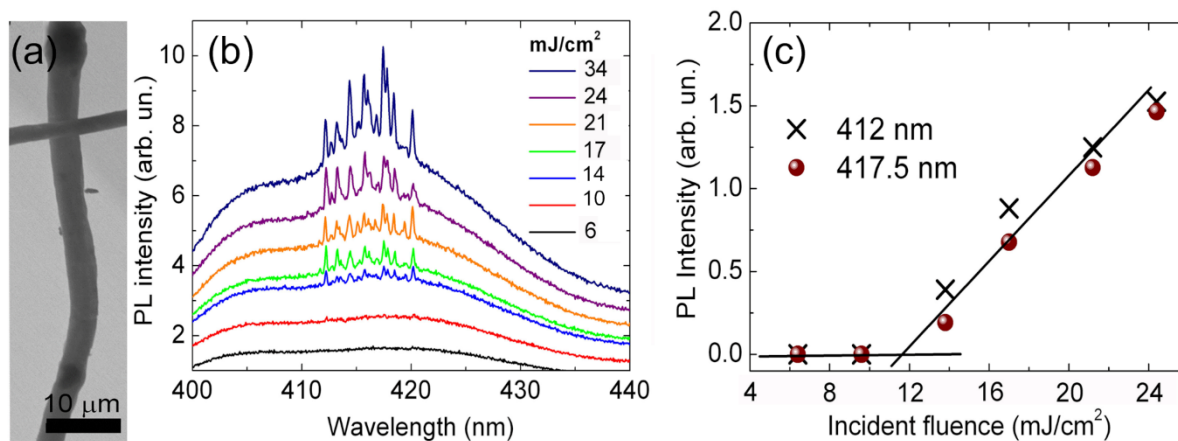

**Figure S4.** Morphological, compositional and RL analysis of randomly oriented fibers with  $\chi = 5\%$  and embedding TiO<sub>2</sub> nanoparticles. (a) Scanning transmission electron microscopy (STEM) micrographs of electrospun fibers doped with TiO<sub>2</sub>. (b) Emission spectra measured at different incident fluences. (c) Plot of the emission intensity vs. incident fluence of two representative RL peaks.

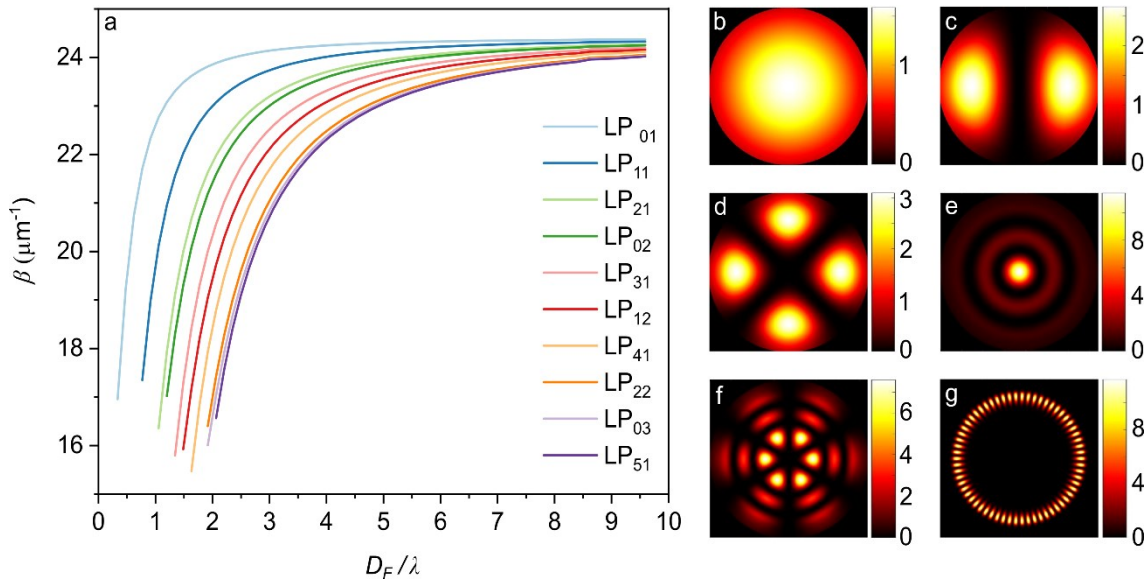

**Figure S5.** Calculated LP modes within a PS fiber. (a) Propagation constant,  $\beta$ , of the first ten LP modes as a function of the parameter  $D_F/\lambda$ , where  $D_F$  is the diameter of the fiber and  $\lambda = 417$  nm (refractive index  $n \cong 1.62$  [S1]). (b-g) Examples of intensity spatial profiles for mode (b)  $LP_{01}$ , (c)  $LP_{11}$ , (d)  $LP_{21}$ , (e)  $LP_{03}$ , (f)  $LP_{33}$  and (g)  $LP_{313}$ . The values of  $\beta$  and the modes spatial profiles are calculated by using the package of Ref. [S2].

**Table S1.** Comparison of optical properties and dye concentration reported for various classes of doped polymer fibers (aligned systems).

| Dye/polymer                                                                                                                                                                                                                                                                                             | Net gain (cm <sup>-1</sup> ) | $\chi^a$ | $\lambda_{em}^b$ (nm) | Reference |
|---------------------------------------------------------------------------------------------------------------------------------------------------------------------------------------------------------------------------------------------------------------------------------------------------------|------------------------------|----------|-----------------------|-----------|
| 4- (dicyano-methylene)-2-tert-butyl-6(1,1,7,7-tetramethyljulolidyl-9-enyl)-4H- pyran /polystyrene                                                                                                                                                                                                       | 31.4                         | 2%       | 605                   | [S3]      |
| 2,7-bis(9,9-diethylfluoren-2-yl)-9-(2-ethylhexyl)carbazole/polystyrene                                                                                                                                                                                                                                  | 24                           | 2%       | 415                   | This work |
| 4-(dicyanomethylene)-2-tert-butyl-6(1,1,7,7-tetramethyljulolidyl-9-enyl)-4H-pyran /polyvinylpyrrolidone                                                                                                                                                                                                 | 23.75                        | 2%       | 670                   | [S4]      |
| 2-[2-[3-[[1,3-dihydro-1,1-dimethyl-3-(3-sulfopropyl)-2H-benz[e]indol-2-ylidene]ethylidene]-2-[4-(ethoxycarbonyl)-1-piperazinyl]-1-cyclopenten-1-yl]ethenyl]-1,1-dimethyl-3-(3-sulfopropyl)-1H-benz[e]indolium hydroxide, inner salt, compound and N,N-diethylethanamine (1:1)/poly(methyl methacrylate) | 7                            | 0.5-1%   | 950                   | [S5]      |
| 2-[[2-[2-[4-(dimethylamino)phenyl]ethenyl]-6-methyl-4H-pyran-4-ylidene]methyl]-3-ethyl iodide/poly(methylmetacrylate)                                                                                                                                                                                   | 5.5                          | 0.16%    | 740                   | [S6]      |
| 4,4'''-bis[(2-butyloctyl)oxy]- 1,1':4',1'':4'',1'''- quaterphenyl/poly(methylmetacrylate)                                                                                                                                                                                                               | 5.4                          | 1%       | 387                   | [S7]      |
| 5-chloro-2-[2- [3-[(5-chloro-3-ethyl-2(3H)-benzothiazol- ylidene)ethylidene]- 2-(diphenylamino)-1-cyclopenten-1-yl]ethenyl]-3-ethyl benzothiazolium perchlorate/ poly(methylmetacrylate)                                                                                                                | 4.2                          | 0.5%     | 910                   | [S6]      |

<sup>a)</sup> ( $\chi$  is expressed as the weight ratio between the incorporated dye and the polymer matrix).

<sup>b)</sup> ( $\lambda_{em}$  is the wavelength of net gain).

## References:

[S1] X. Zhang, J. Qiu, X. Li, J. Zhao, L. Liu, *Appl. Opt.* **2020**, *59*, 2337.

[S2] M. Hughes, Fibre Mode Solver and Simulator,

<https://www.mathworks.com/matlabcentral/fileexchange/77497-fibre-mode-solver-and-simulator>,

MATLAB Central File Exchange. Retrieved September 13, 2021.

[S3] X. Yu, M. Feng, R. Zhang, Y. Feng, H. You, F. Guo, S. Chen, D. Zhang, *Org. Electron.* **2017**, *51*, 442.

[S4] F. Guo, H. You, D. Zhang, S. Chen, *Org. Electron.* **2018**, *63*, 5.

[S5] G. Morello, A. Camposeo, M. Moffa, D. Pisignano, *ACS Appl. Mater. Interfaces* **2015**, *7*, 5213.

[S6] G. Morello, M. Moffa, S. Girardo, A. Camposeo, D. Pisignano, *Adv. Func. Mat.* **2014**, *24*, 5225.

[S7] G. Morello, R. Manco, M. Moffa, L. Persano, A. Camposeo, D. Pisignano, *ACS Appl. Mater. Interfaces* **2015**, *7*, 21907.
